# Supplementary material for: Ternary afterglow and dynamic anti-counterfeiting applications of self-activated zinc germanate
Source: Royal Society of Chemistry journal article supplement (doi:10.1039/d4tc04090b), 2024-10-25
Supplement: d4tc04090b1.pdf [file d4tc04090b1.pdf]

Supporting information

## Ternary Afterglow and Dynamic Anti-counterfeiting Application of Self-activated Zinc Germanate

Tianyu Hu, Jie Yu, Qiqi Zeng, Cong Zhang, Yuanjie Teng, Kang  
Shao, Zaifa Pan\*

*\*College of Chemical Engineering, Zhejiang University of Technology, Hangzhou 310014, China.*

*Corresponding Author E-mail: panzaifa@zjut.edu.cn*

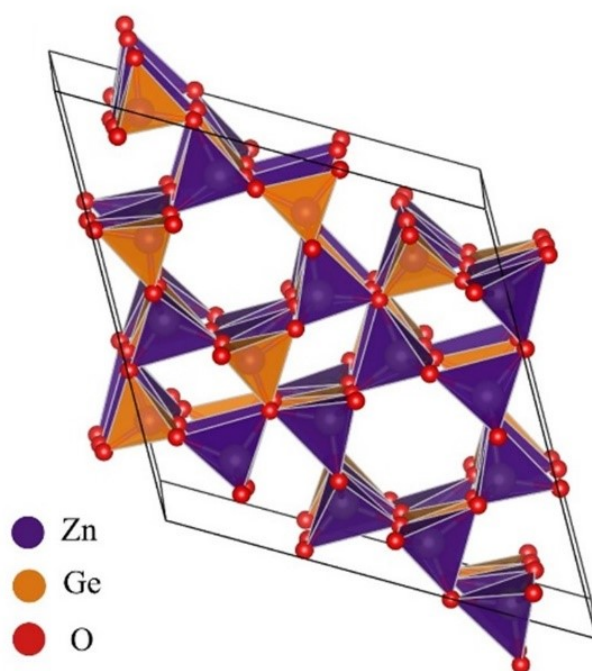

**Fig. S1.** Crystal structure of ZGO. Purple balls represent Zn atoms, orange balls represent Ge atoms, and red balls represent O atoms.

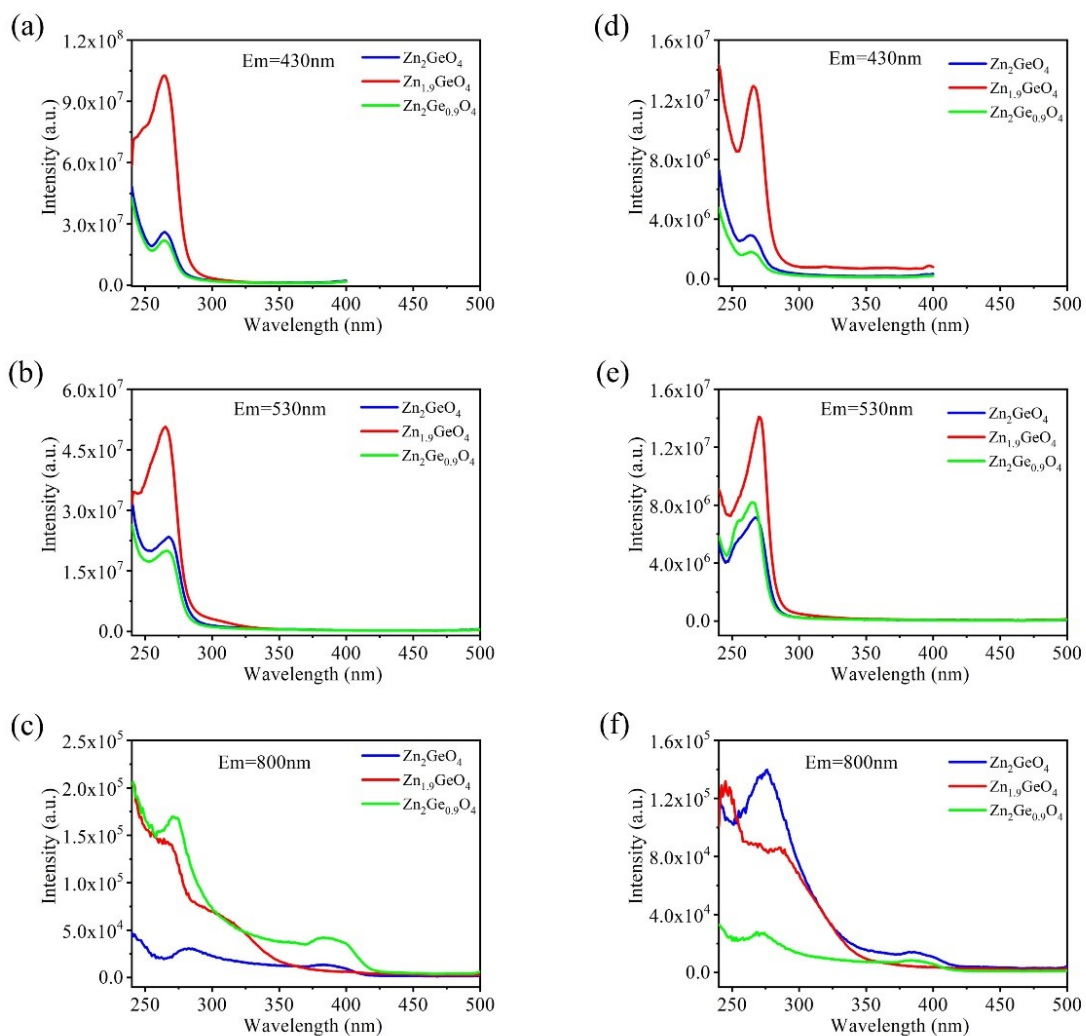

**Fig. S2.** Excitation spectra of ZGO at emission wavelengths of (a) 430 nm, (b) 530 nm, and (c) 800 nm in air atmosphere and (d) 430 nm, (e) 530 nm, and (f) 800 nm in N<sub>2</sub> atmosphere.

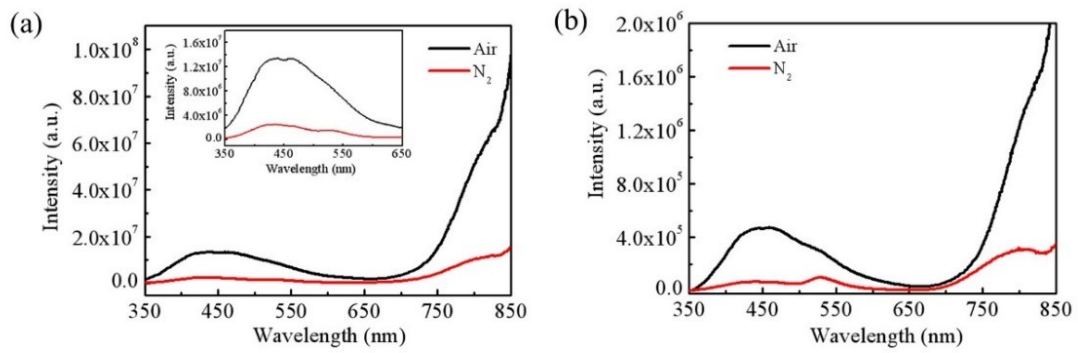

**Fig. S3.** (a) Steady-state and (b) time-resolved emission spectra of  $Zn_{1.9}GeO_4$  in different sintering atmospheres.

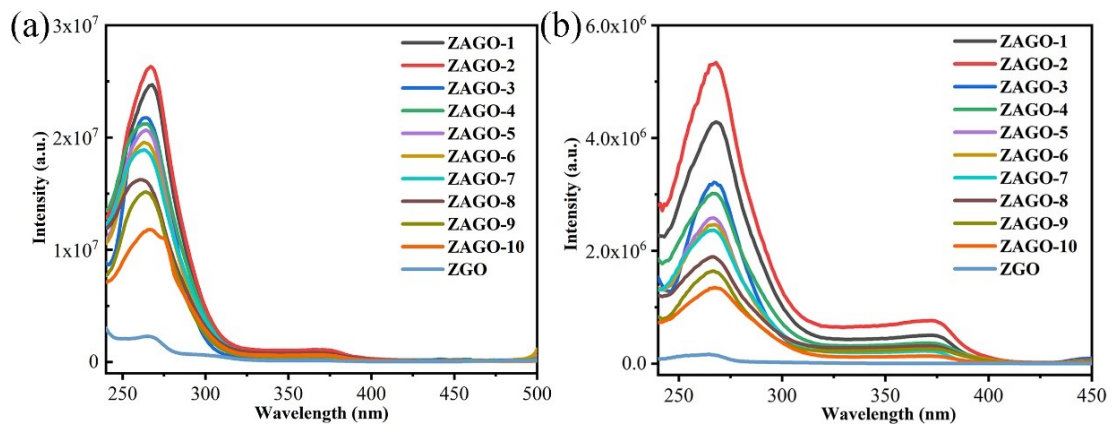

**Fig. S4.** Excitation spectra of ZAGO at different doping concentrations of Al<sup>3+</sup> monitored at (a) 530 nm and (b) 632 nm.

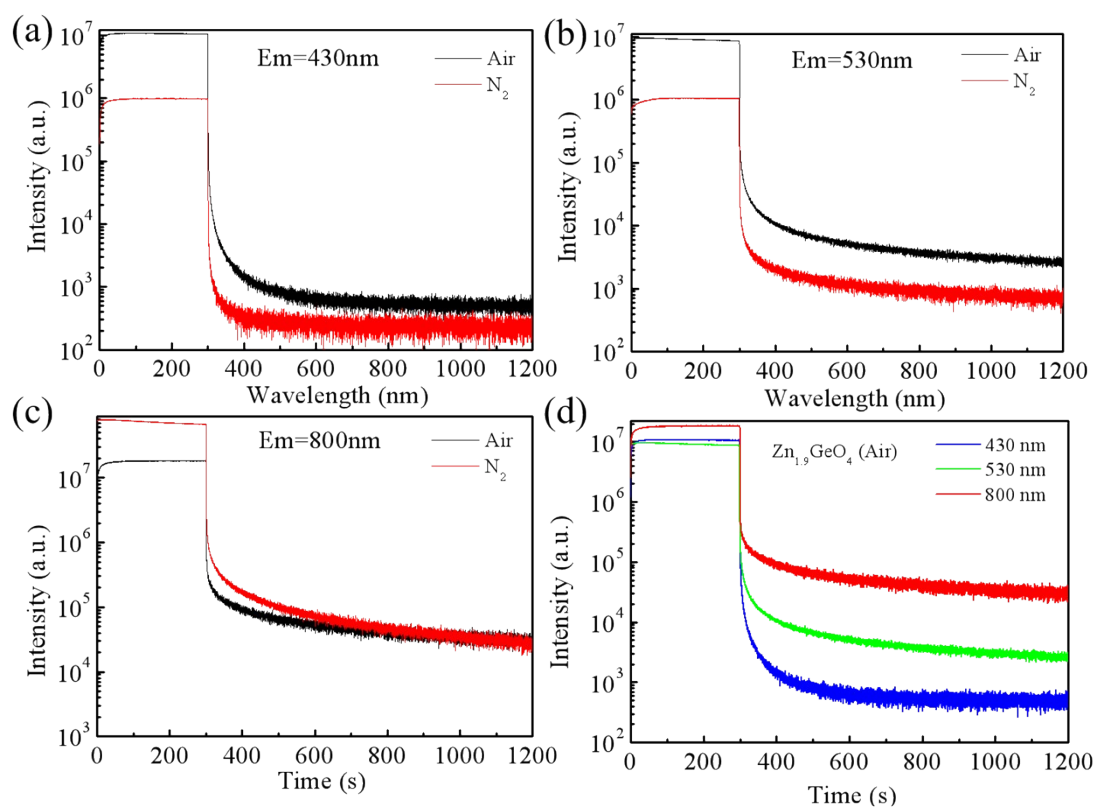

**Fig. S5.** The decay curves of  $Zn_{1.9}GeO_4$  at emission wavelengths of (a) 430 nm, (b) 530 nm, and (c) 800 nm in different sintering atmospheres, together with (d)  $Zn_{1.9}GeO_4$  at different emission wavelengths in air atmosphere.

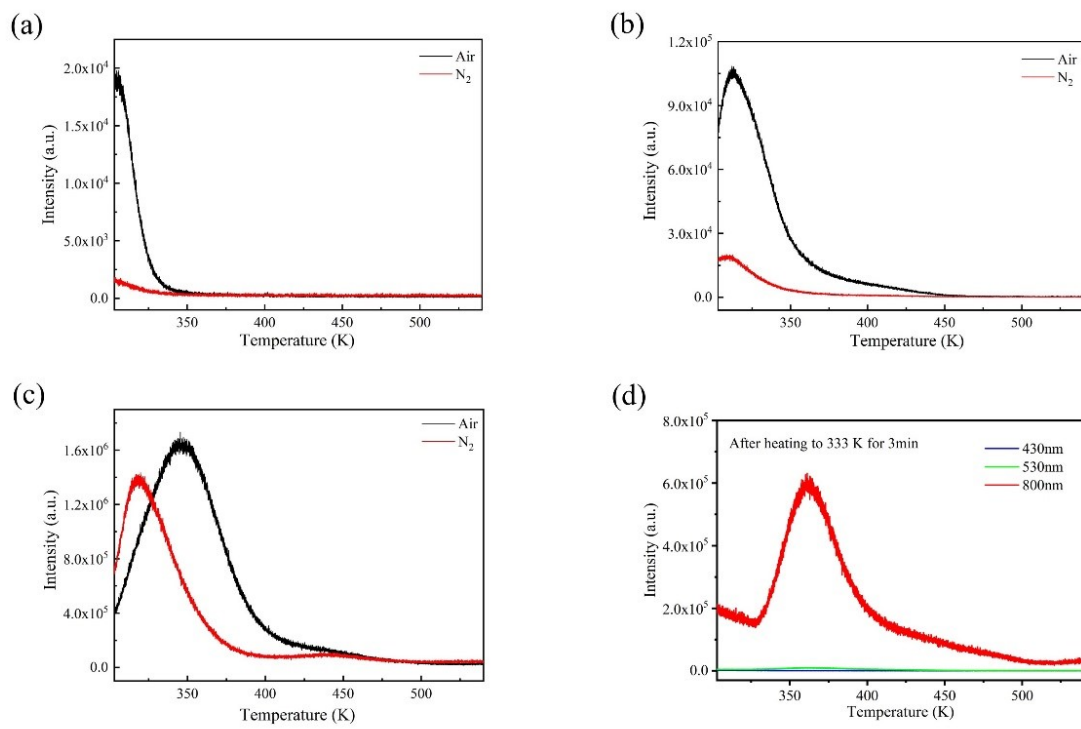

**Fig. S6.** The thermoluminescence spectra of  $Zn_{1.9}GeO_4$  at emission wavelengths of (a) 430 nm, (b) 530 nm, and (c) 800 nm in different sintering atmospheres, together with (d)  $Zn_{1.9}GeO_4$  after thermal clearance at 333 K in air atmosphere.

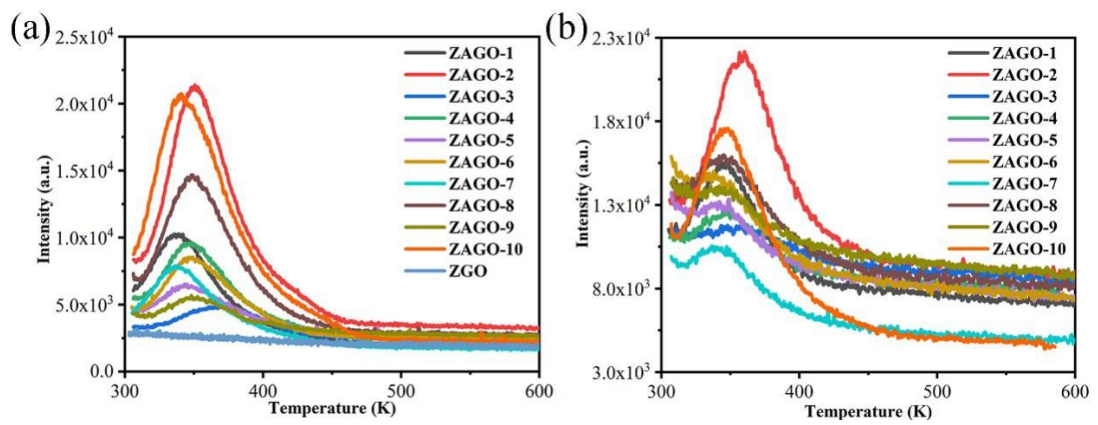

**Fig. S7.** TL spectra of ZAGO at emission wavelengths of (a) 530 nm, and (b) 632 nm in different atmospheres, together with (c) peak temperature and (d) trap depth of ZAGO at different emissions. ZAGO, Al<sup>3+</sup>-doped zinc germanate; TL, thermoluminescence.

---

**Table S1**

The designed stoichiometric ratios and sintering atmospheres for ZGO samples.

| <b>Sample</b>                          | <b>Zn/Ge ratio</b> | <b>Sintering atmosphere</b> |
|----------------------------------------|--------------------|-----------------------------|
| $\text{Zn}_{1.9}\text{GeO}_4$          | 1.9:1              | air, N <sub>2</sub> , CO    |
| $\text{Zn}_2\text{GeO}_4$              | 2:1                | air, N <sub>2</sub> , CO    |
| $\text{Zn}_2\text{Ge}_{0.9}\text{O}_4$ | 1:1.9              | air, N <sub>2</sub> , CO    |



---

**Table S2**

The doping content and chemical composition of ZAGO samples.

| <b>Sample</b> | <b>Doping content</b> | <b>Chemical composition</b>                               |
|---------------|-----------------------|-----------------------------------------------------------|
| ZGO           | 0                     | $\text{Zn}_2\text{GeO}_4$                                 |
| ZAGO-1        | 0.005                 | $\text{Zn}_2\text{Al}_{0.005}\text{Ge}_{0.995}\text{O}_4$ |
| ZAGO-2        | 0.01                  | $\text{Zn}_2\text{Al}_{0.01}\text{Ge}_{0.99}\text{O}_4$   |
| ZAGO-3        | 0.015                 | $\text{Zn}_2\text{Al}_{0.015}\text{Ge}_{0.985}\text{O}_4$ |
| ZAGO-4        | 0.02                  | $\text{Zn}_2\text{Al}_{0.02}\text{Ge}_{0.98}\text{O}_4$   |
| ZAGO-5        | 0.025                 | $\text{Zn}_2\text{Al}_{0.025}\text{Ge}_{0.975}\text{O}_4$ |
| ZAGO-6        | 0.03                  | $\text{Zn}_2\text{Al}_{0.03}\text{Ge}_{0.97}\text{O}_4$   |
| ZAGO-7        | 0.035                 | $\text{Zn}_2\text{Al}_{0.035}\text{Ge}_{0.965}\text{O}_4$ |
| ZAGO-8        | 0.04                  | $\text{Zn}_2\text{Al}_{0.04}\text{Ge}_{0.96}\text{O}_4$   |
| ZAGO-9        | 0.045                 | $\text{Zn}_2\text{Al}_{0.045}\text{Ge}_{0.955}\text{O}_4$ |
| ZAGO-10       | 0.05                  | $\text{Zn}_2\text{Al}_{0.05}\text{Ge}_{0.95}\text{O}_4$   |

---

**Table S3**

Bandgap widths of ZAGO samples.

| <b>Sample</b> | <b>Bandgap width/eV</b> |
|---------------|-------------------------|
| ZGO           | 4.40                    |
| ZAGO-1        | 4.37                    |
| ZAGO-2        | 4.36                    |
| ZAGO-3        | 4.35                    |
| ZAGO-4        | 4.30                    |
| ZAGO-5        | 4.33                    |
| ZAGO-6        | 4.32                    |
| ZAGO-7        | 4.07                    |
| ZAGO-8        | 4.23                    |
| ZAGO-9        | 4.31                    |
| ZAGO-10       | 4.31                    |

---

**Table S4**

Parameters for double-exponentially fitting afterglow decay of ZGO and a representative ZAGO sample.

| <b>Sample</b> | <b><math>\tau_1/s</math></b> | <b><math>A_1</math></b> | <b><math>\tau_2/s</math></b> | <b><math>A_2</math></b> | <b><math>\tau_{avg}/s</math></b> |
|---------------|------------------------------|-------------------------|------------------------------|-------------------------|----------------------------------|
| ZGO           | 7.2                          | 2.43                    | 84.63                        | 0.68                    | 66.58                            |
| ZAGO-2        | 8.95                         | 1.81                    | 131.20                       | 1.35                    | 120.95                           |

**Table S5**

The positions of thermal release peak and the depths of trap in ZGO samples.

| Emission<br>Wavelength<br>h |                 | $Zn_2Ge_{0.9}O_4$ |                | $Zn_2GeO_4$ |                | $Zn_{1.9}GeO_4$ |                |
|-----------------------------|-----------------|-------------------|----------------|-------------|----------------|-----------------|----------------|
|                             |                 | air               | N <sub>2</sub> | air         | N <sub>2</sub> | air             | N <sub>2</sub> |
| 430 nm                      | Temperature (K) | < 303             | < 303          | 303         | < 303          | 303             | < 303          |
|                             | Depth (eV)      | < 0.61            | < 0.61         | 0.61        | < 0.61         | 0.61            | < 0.61         |
| 530 nm                      | Temperature (K) | < 303             | 307            | 307         | < 303          | 313             | 307            |
|                             | Depth (eV)      | < 0.61            | 0.61           | 0.61        | < 0.61         | 0.63            | 0.61           |
| 800 nm                      | Temperature (K) | 311               | 319            | 311         | 319            | 345             | 319            |
|                             |                 | 423               | 408            | 423         | 408            | 453             | 453            |
|                             | Depth (eV)      | 0.62              | 0.64           | 0.62        | 0.64           | 0.70            | 0.64           |
|                             |                 | 0.85              | 0.82           | 0.85        | 0.82           | 0.91            | 0.91           |
